# Supplementary material
Source: MDPI journal article supplement (https://www.mdpi.com/2071-1050/9/8/1368)
Supplement: s1 [file s1]

**Supplementary Materials:**

**Table S1.** Tests of the outcome variable: IIA (independence of irrelevant alternatives) assumption and potential for category combination (n = 238)

| Hausman tests of the IIA assumption† |          |    |       | LR tests for combining alternatives           |          |    |       |
|--------------------------------------|----------|----|-------|-----------------------------------------------|----------|----|-------|
| Omitted                              | $\chi^2$ | df | p     | Alternatives tested                           | $\chi^2$ | df | p     |
| Lower part of a bridge               | 18.876   | 51 | 1.000 | Lower part of a bridge–natural waterside      | 27.496   | 16 | 0.036 |
| Natural waterside                    | 23.804   | 51 | 1.000 | Lower part of a bridge–inner part of a border | 46.941   | 16 | 0.000 |
| Inner part of a border               | 20.196   | 51 | 1.000 | Lower part of a bridge–areas with stepstones  | 50.213   | 16 | 0.000 |
| Areas with stepstones                | 21.308   | 51 | 1.000 | Lower part of a bridge–artificial waterside   | 25.765   | 16 | 0.057 |
|                                      |          |    |       | Natural waterside–inner part of a border      | 33.934   | 16 | 0.006 |
|                                      |          |    |       | Natural waterside–areas with stepstones       | 45.229   | 16 | 0.000 |
|                                      |          |    |       | Natural waterside–artificial waterside        | 15.001   | 16 | 0.525 |
|                                      |          |    |       | Inner part of a border–areas with stepstones  | 21.255   | 16 | 0.169 |
|                                      |          |    |       | Inner part of a border–artificial waterside   | 36.492   | 16 | 0.002 |
|                                      |          |    |       | Areas with stepstones–artificial waterside    | 53.026   | 16 | 0.000 |

† In addition to the tests, the assumption must be conceptually supported.
